# Supplementary material for: Sodium Valproate, a Histone Deacetylase Inhibitor, Is Associated With Reduced Stroke Risk After Previous Ischemic Stroke or Transient Ischemic Attack
Source: PubMed Central journal article supplement (PMC5753817; doi:10.1161/strokeaha.117.016674), 2017-12-15
Supplement: str-49-054-s001.pdf [file str-49-054-s001.pdf]

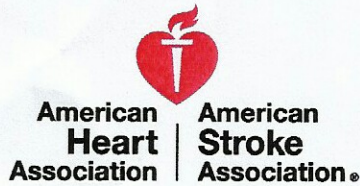

**Acknowledgment Permission Form**

**Journal** Stroke  
**Manuscript Number** STROKE/2017/016674R3  
**First Author** Rebecca L Brookes  
**Title of Work** Sodium valproate, an HDAC inhibitor, is associated with reduced stroke risk after previous ischaemic stroke or TIA

Authors must provide written permission/approval from all individuals mentioned by name in the Acknowledgments section of a submitted manuscript. By signing this form, any and all acknowledged persons therefore state that they have read and approved the mention of their names in the Acknowledgment section of the aforementioned paper.

|           |                      |           |                        |      |                   |
|-----------|----------------------|-----------|------------------------|------|-------------------|
| Name (1)  | <u>ADINA FEUDMAN</u> | Signature | <u>Adina L Feudman</u> | Date | <u>11/10/2017</u> |
| Name (2)  | _____                | Signature | _____                  | Date | _____             |
| Name (3)  | _____                | Signature | _____                  | Date | _____             |
| Name (4)  | _____                | Signature | _____                  | Date | _____             |
| Name (5)  | _____                | Signature | _____                  | Date | _____             |
| Name (6)  | _____                | Signature | _____                  | Date | _____             |
| Name (7)  | _____                | Signature | _____                  | Date | _____             |
| Name (8)  | _____                | Signature | _____                  | Date | _____             |
| Name (9)  | _____                | Signature | _____                  | Date | _____             |
| Name (10) | _____                | Signature | _____                  | Date | _____             |
| Name (11) | _____                | Signature | _____                  | Date | _____             |
| Name (12) | _____                | Signature | _____                  | Date | _____             |
| Name (13) | _____                | Signature | _____                  | Date | _____             |
| Name (14) | _____                | Signature | _____                  | Date | _____             |
| Name (15) | _____                | Signature | _____                  | Date | _____             |
| Name (16) | _____                | Signature | _____                  | Date | _____             |
| Name (17) | _____                | Signature | _____                  | Date | _____             |
| Name (18) | _____                | Signature | _____                  | Date | _____             |
| Name (19) | _____                | Signature | _____                  | Date | _____             |
| Name (20) | _____                | Signature | _____                  | Date | _____             |
